# Supplementary material
Source: PubMed Central journal article supplement (PMC5423146)
Supplement: MOL2-10-625-s001.pdf [file MOL2-10-625-s001.pdf]

**A****Day 22 post GBM8**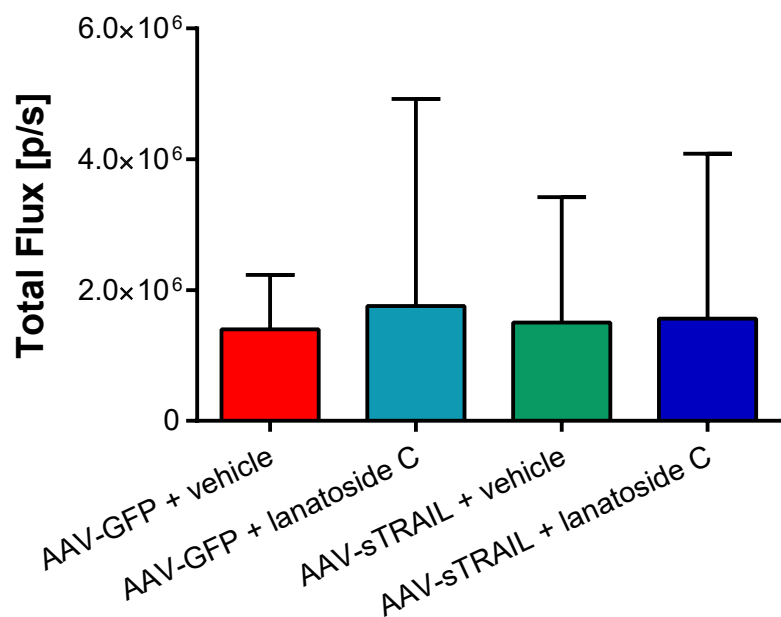**B****Day 15 post GBM8**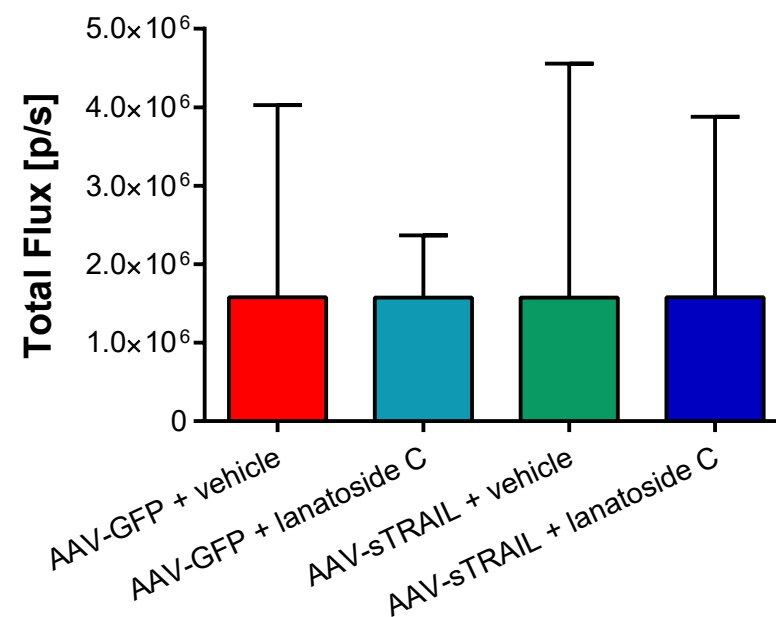

**Supplementary Figure 1. Pseudo-randomization before the start of treatment.** Mice were divided into four treatment groups so that the average tumor-associated Fluc signal for each group is equal, in the AAV-sTRAIL experiment with a single i.c. injection (**A**;  $p = 0.9955$ ) or multiple injections (**B**;  $p > 0.9999$ ).

**A**

Day 36 post GBM8  
2 weeks post AAV-sTRAIL

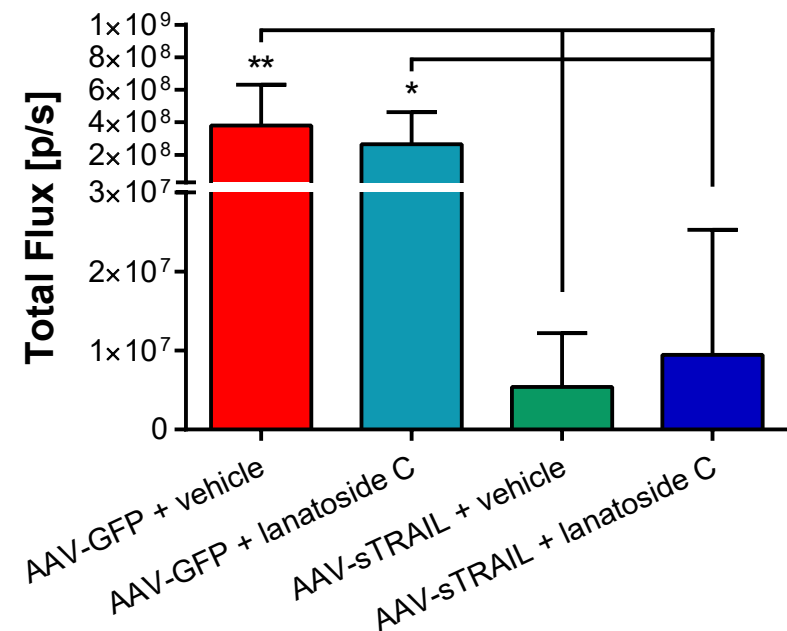**B**

Day 71 post GBM8  
7 weeks post AAV-sTRAIL

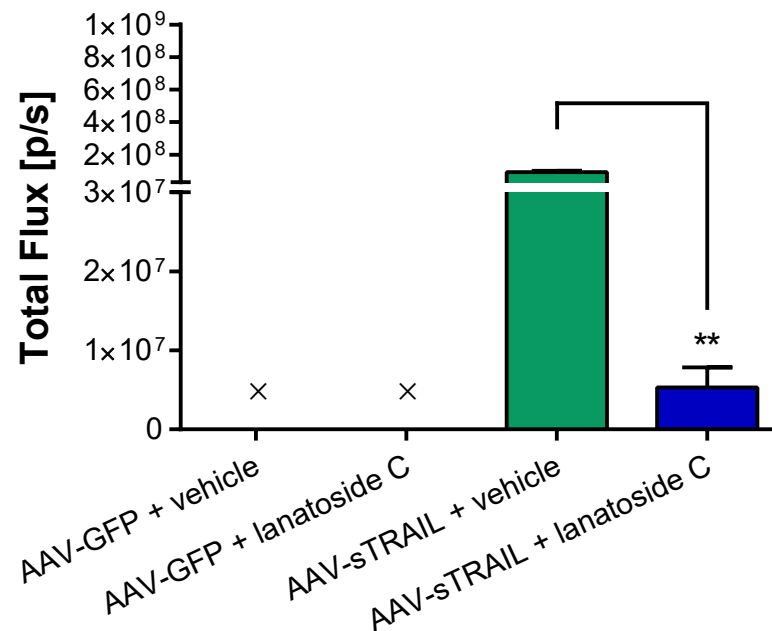

**Supplementary Figure 2. AAVrh.8-sTRAIL combined with lanatoside C significantly reduces tumor size in GBM8-tumor bearing mice.** (A) At 36 days post GBM8 injection, a significant difference is observed between animals treated with AAV-GFP control vector +/- lanatoside C and animals treated with AAV-sTRAIL +/- lanatoside C. All animals in the former groups had to be sacrificed due to tumor burden. (B) At 71 days post GBM8 injection, there is a significant difference in animals treated with AAV-sTRAIL + vehicle vs. AAV-sTRAIL + lan C. At this point, all animals in the control groups had been sacrificed due to tumor burden. (\*p < 0.02, \*\*p < 0.001).
